# Supplementary material for: Near-Infrared Light-Triggered Generation of Reactive Oxygen Species and Induction of Local Hyperthermia from Indocyanine Green Encapsulated Mesoporous Silica-Coated Graphene Oxide for Colorectal Cancer Therapy
Source: MDPI journal article supplement (doi:10.3390/antiox11010174), 2022-01-17
Supplement: s1 [file s1]

## SUPPLEMENTARY MATERIALS

### Near-infrared Light Triggered Generation of Reactive Oxygen Species from Indocyanine Green Encapsulated Mesoporous Silica-coated Graphene Oxide for Colorectal Therapy

Hyung Woo Choi<sup>1,†</sup>, Jae Hyun Lim<sup>2,†</sup>, Chan Woo Kim<sup>3,4,†</sup>, Eunmi Lee<sup>3,4</sup>, Jin-Moo Kim<sup>3,4</sup>, Kiyuk Chang<sup>3,4,\*</sup>, Bong Geun Chung<sup>1,\*</sup>

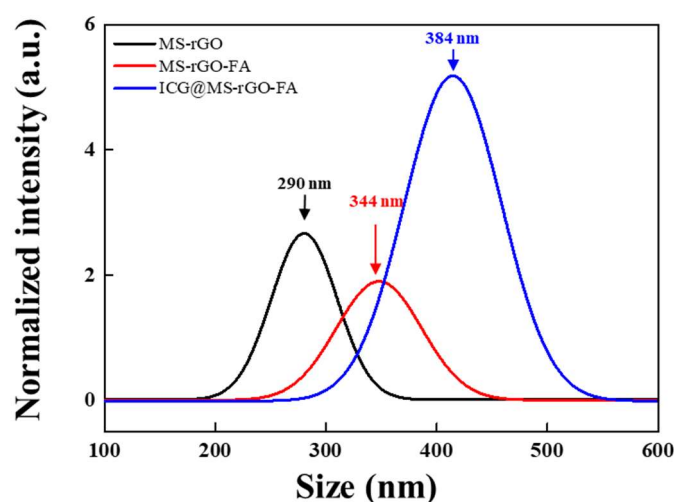

**Figure S1.** Size distribution of MS-rGO, MS-rGO-FA, and ICG@MS-rGO-FA nanocomposites.

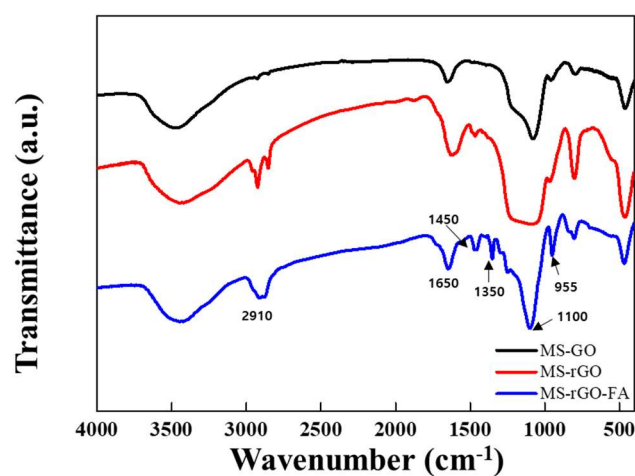

**Figure S2.** FT-IR spectra of MS-GO, MS-rGO, and MS-rGO-FA nanocomposites.

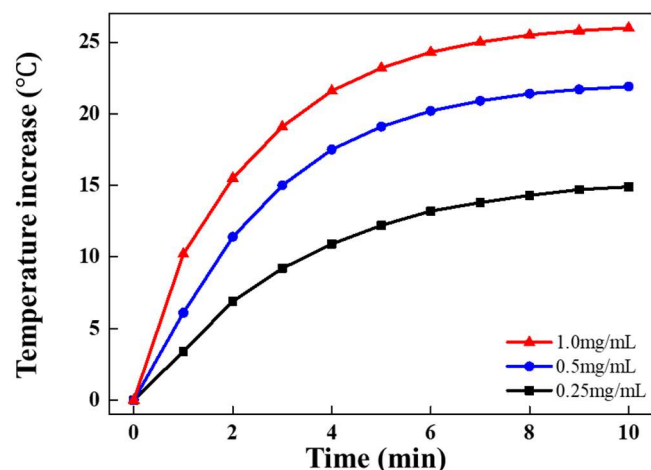

**Figure S3.** Temperature analysis of ICG@MS-rGO-FA nanocomposites with various concentrations under NIR laser irradiation (0.25-1.0 mg/mL, 1.0 W/cm<sup>2</sup>).

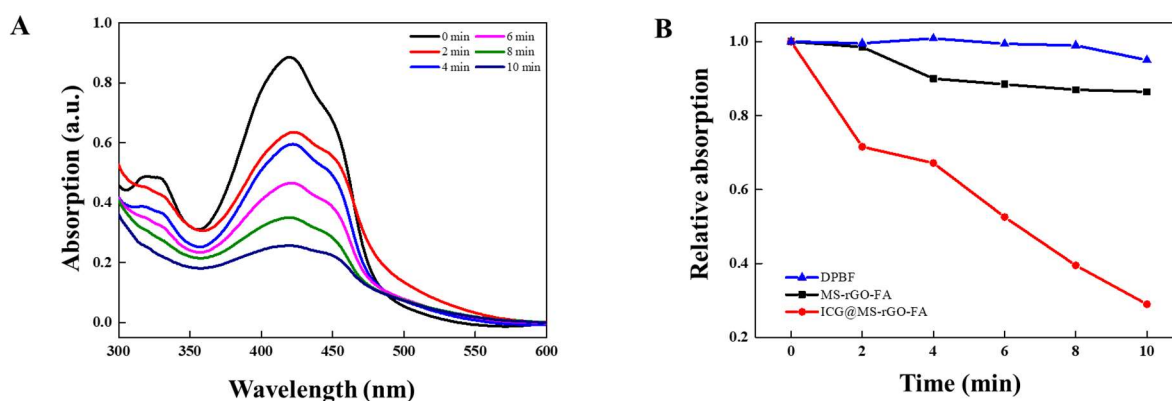

**Figure S4.** (A) Absorption spectra of DPBF solution including ICG@MS-rGO-FA nanocomposites after different times with 808 nm laser irradiation (1.0 W/cm<sup>2</sup>). (B) The ROS generation curves of DPBF probe, MS-rGO-FA, and ICG@MS-rGO-FA nanocomposites, respectively.

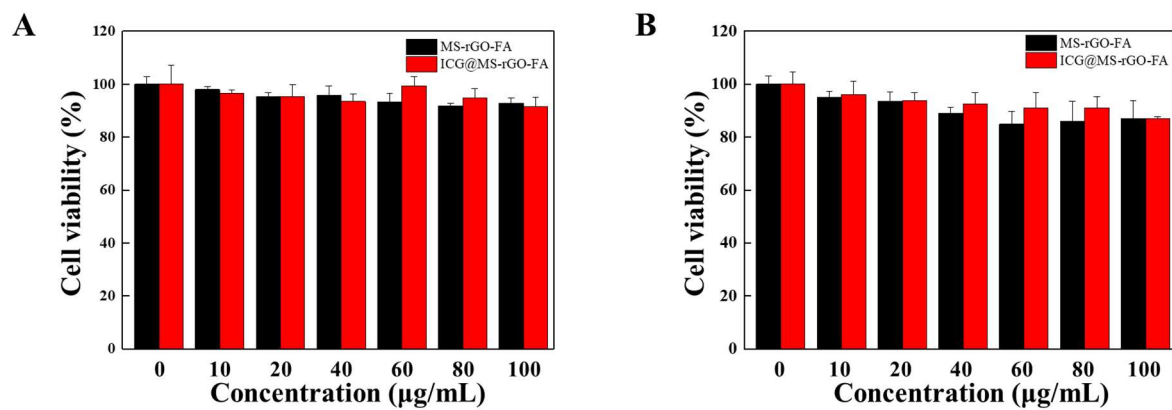

**Figure S5.** Cytotoxicity analysis of (A) NIH-3T3 fibroblast cells and (B) CT-26 cells treated with MS-rGO-FA and ICG@MS-rGO-FA nanocomposites.

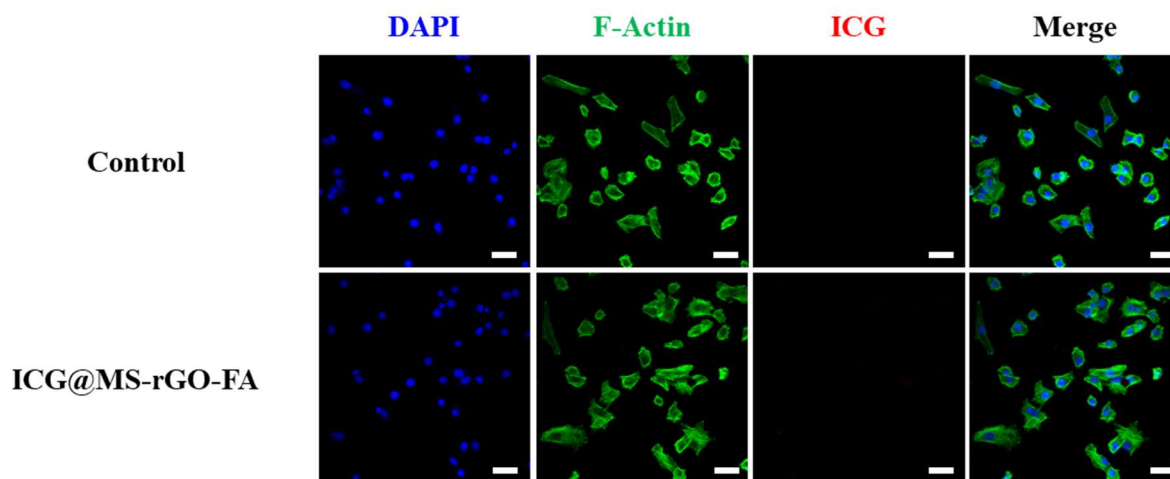

**Figure S6.** Confocal fluorescence images of NIH-3T3 fibroblast cells treated with ICG@MS-rGO-FA nanocomposites. Scale bars are 20 µm.

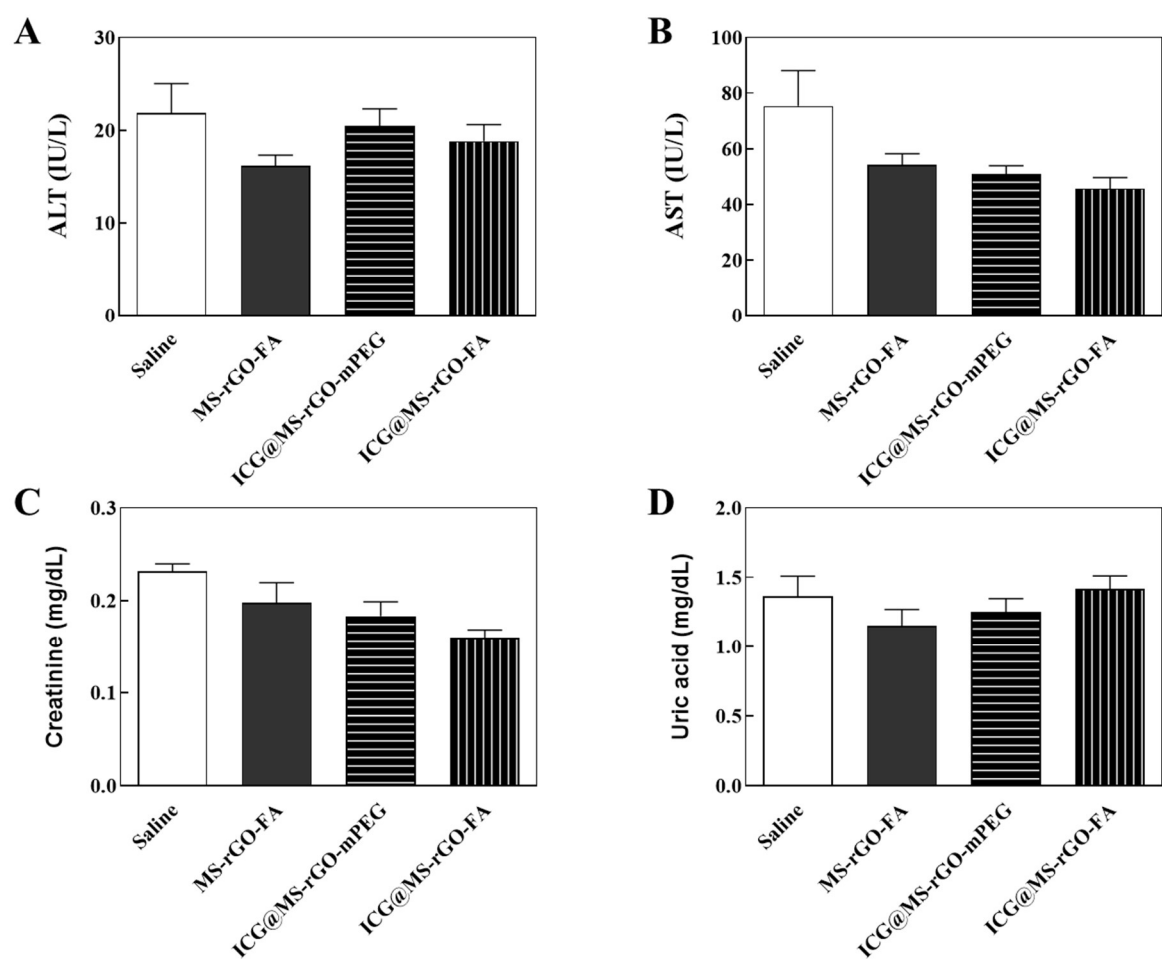

**Figure S7.** Serum biochemical parameters assay (ALT, AST, creatinine, and uric acid).

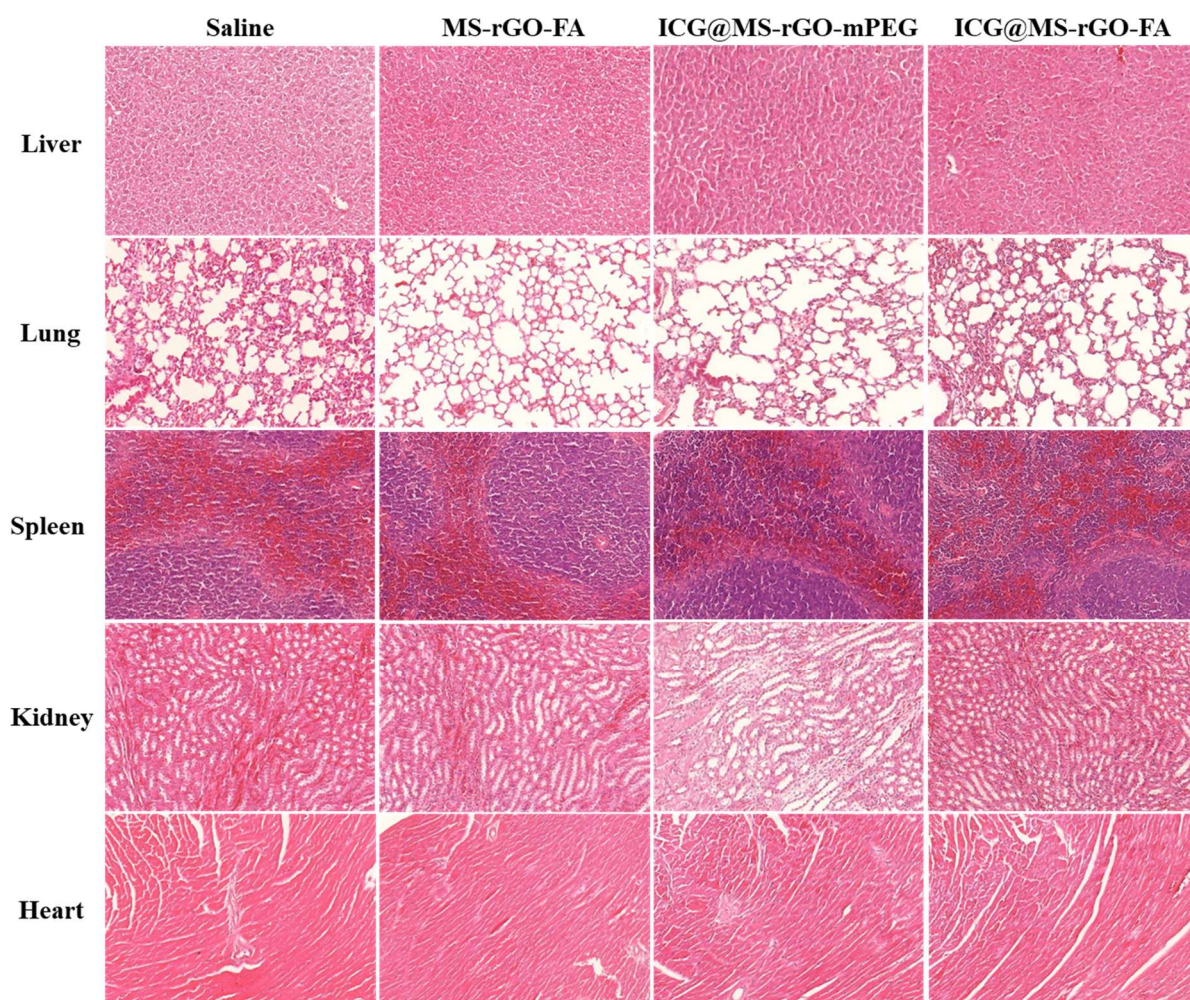

**Figure S8.** Histological images (H&E staining) obtained in major organs (e.g., liver, lung spleen, kidney, and heart) of the mice after treatment under various conditions.
